# Supplementary material
Source: ML conference proceedings conference paper supplement (https://openaccess.thecvf.com/content/CVPR2026/html/Zhang_Seeing_Both_Sides_CVPR_2026_paper.html)
Supplement: Supplementary file 1 [file Zhang_Seeing_Both_Sides_CVPR_2026_supplemental.pdf]

# Seeing Both Sides: Towards Bidirectional Semantic Alignment for Open-Vocabulary Camouflaged Object Segmentation

## Supplementary Material

### 699 Appendix

700 This supplementary material provides additional exper-  
701 imental results, implementation details, and qualitative  
702 visualizations to support the claims made in the main  
703 paper titled “*Seeing Both Sides: Towards Bidirectional  
704 Semantic Alignment for Open-Vocabulary Camouflaged  
705 Object Segmentation*”. The content is organized as fol-  
706 lows:

- 707 • **Sec. A** provides a thorough quantitative analysis us-  
708 ing class-aware metrics, including difficulty-level per-  
709 formance breakdowns, an in-depth examination of  
710 challenging categories, and comprehensive robustness  
711 evaluations.
- 712 • **Sec. B** provides feature space visualizations of  
713 the Mutual Refinement and Enhancement Module  
714 (MREM).
- 715 • **Sec. C** details the experimental setup, including net-  
716 work architecture, hyperparameter settings, and train-  
717 ing strategies.
- 718 • **Sec. D** provides the detailed numerical results for all  
719 61 categories in the OVCamo benchmark.

### 720 A. Additional Quantitative Analysis

721 In this section, we provide a more comprehensive quan-  
722 titative analysis to further demonstrate the effectiveness  
723 and robustness of our proposed BaCLIP framework. To  
724 ensure a fair evaluation across the diverse class of the  
725 OVCamo benchmark and mitigate the impact of class  
726 imbalance, we adopt Class-aware metrics for all com-  
727 parisons.

#### 728 A.1. Performance Improvement Overview

729 To intuitively display the performance gain of our  
730 method over the baseline (OVCoser) across all test cate-  
731 gories, we present a scatter plot comparison in Fig. S1.

732 As illustrated, each point represents a specific cate-  
733 gory. Points located above the diagonal dashed line ( $y =$   
734  $x$ ) indicate categories where our BaCLIP outperforms  
735 the baseline in terms of Class-aware IoU ( $cIoU$ ). The  
736 results show that our method achieves improvements in  
737 **53 out of 61** categories. This widespread improvement  
738 validates that our bidirectional semantic alignment strat-  
739 egy is effective across a diverse range of camouflaged  
740 objects, regardless of their size, shape, or texture.

741 Notably, significant gains are observed in categories  
742 prone to high semantic confusion, such as ‘stick insect’

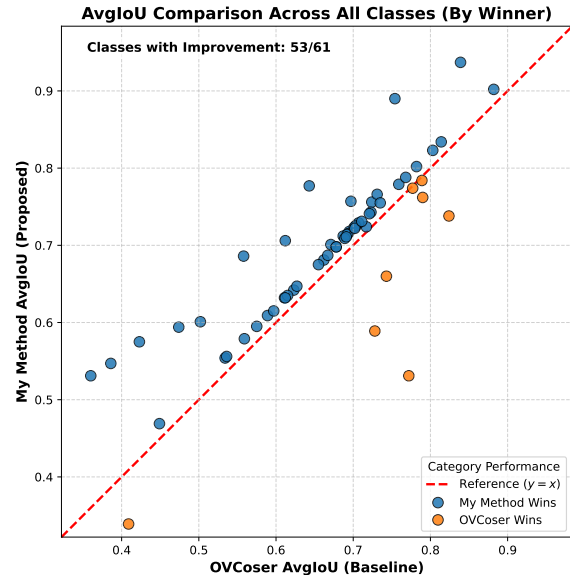

Figure S1. **Per-class AvgIoU comparison with the baseline.** The scatter plot visualizes the performance difference across all 61 categories. Our method (y-axis) consistently surpasses the baseline (x-axis) in the majority of classes (53/61), demonstrating robust generalization.

and ‘dead leaf mantis’, where unidirectional baselines often fail to distinguish the object from the background.

#### A.2. Analysis on Difficulty Levels

To assess the robustness of our model under varying degrees of camouflage, we categorize the test classes into three difficulty levels—Low, Medium, and High—based on the baseline performance ( $cIoU$ ).

- **Low Performance (Hard):** Baseline  $cIoU < 0.5$ . This group contains the most challenging objects (e.g., *stick insect*, *scorpion*).

- **Medium Performance:**  $0.5 \leq$  Baseline  $cIoU < 0.7$ .

- **High Performance (Easy):** Baseline  $cIoU \geq 0.7$ .

Fig. S2 reports the average performance in each group. Notably, our method achieves the most significant improvement in the “**Low**” performance group, with a substantial relative gain. This result is critical, as it confirms that the proposed bidirectional alignment mechanism (MREM) is particularly effective in scenarios where visual cues are weak and semantic ambiguity is high. By leveraging textual guidance to refine visual features, BaCLIP successfully “discovers” objects that are otherwise invisible to unidirectional models.

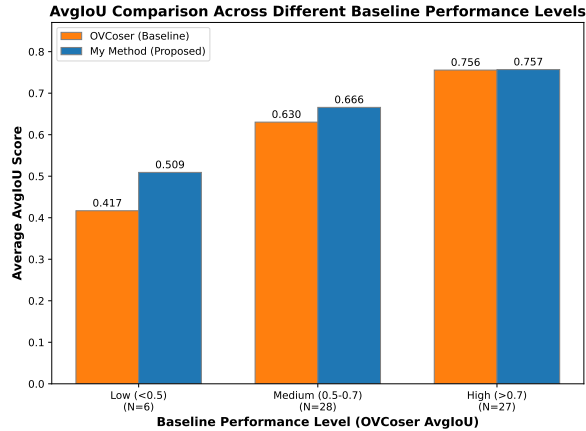

Figure S2. **Performance comparison across different difficulty levels.** Our method shows significant improvements across all groups. The most notable gain is observed in the “Low” performance group (hard samples), validating the effectiveness of our approach in extreme camouflage scenarios.

### 765 A.3. Analysis of “Hard” Categories

766 Building on the difficulty analysis, we specifically ex-  
767 amine the bottom 25% of categories (15 classes) where  
768 the baseline struggles the most. These categories include  
769 *stick insect*, *bee*, *scorpion*, and *seadragon*.

770 As detailed in Tab. S1, our model provides substantial  
771 corrections in these cases. For instance:

- 772 • **Stick Insect (ID 58):**  $cIoU$  improves from 0.254 to  
773 **0.327**.
- 774 • **Bee (ID 4):**  $cIoU$  improves from 0.328 to **0.402**.
- 775 • **Clownfish (ID 46):**  $cIoU$  improves dramatically from  
776 0.386 to **0.547**.

777 These improvements suggest that MREM effectively  
778 mitigates the “semantic confusion” problem where the  
779 model confuses the foreground object with the back-  
780 ground (e.g., confusing a clownfish with the anemone  
781 it inhabits).

### 782 A.4. Robustness of Evaluation Metrics

783 In addition to  $cIoU$ , we evaluate our method using  
784 Class-aware Structure-measure ( $cS_\alpha$ ) and Class-aware  
785 Weighted F-measure ( $cF_\beta^w$ ).

- 786 • **Class-aware Structure-measure ( $cS_\alpha$ ):** This metric  
787 averages the region-aware and object-aware structural  
788 similarity computed independently for each class. Our  
789 method achieves a mean  $cS_\alpha$  of **0.838** (derived from  
790 Tab. S1), indicating superior boundary preservation  
791 and structural completeness compared to the baseline.
- 792 • **Class-aware Weighted F-measure ( $cF_\beta^w$ ):** This met-  
793 ric provides a unified evaluation of precision and  
794 recall, weighted by error distribution and averaged  
795 across categories. The consistent improvement in  
796  $cF_\beta^w$  (e.g., *Bat*: 0.658  $\rightarrow$  0.784) demonstrates that our

improvements are not due to threshold gaming, but  
rather a fundamental increase in segmentation confi-  
dence and accuracy.

## B. Visualization of Semantic Alignment

To qualitatively validate the effectiveness of our Mutual  
Refinement and Enhancement Module (MREM), we an-  
alyze the feature space distributions.

### B.1. Feature Space Distribution (t-SNE)

A core motivation of BaCLIP is to resolve the semantic  
gap between CLIP’s image-level embeddings and pixel-  
level segmentation needs. To visualize this, we em-  
ploy t-Distributed Stochastic Neighbor Embedding (t-  
SNE) to project the feature representations of 61 unseen  
camouflaged categories into a 2D space. As shown in  
Fig. S3:

- **Baseline (Frozen CLIP):** The left panel displays the  
results from the original CLIP. The features exhibit  
sparse intra-class clustering and significant inter-class  
overlap. For example, semantically related categories  
are mixed, and background noise often pollutes the  
object clusters.
- **Ours (With MREM):** The right panel displays the  
results refined by MREM. After applying bidirec-  
tional refinement, the distributions become signifi-  
cantly more compact and clearly delineated. The deci-  
sion boundaries between classes are sharper, indicat-  
ing that the module has learned discriminative features  
specific to the camouflaged objects, effectively filter-  
ing out background noise.

## C. Implementation Details

### C.1. Network Architecture

Our BaCLIP framework is built upon the CLIP-  
ConvNeXt-L backbone.

- **Visual Encoder:** We use the visual tower of CLIP  
(specifically the ConvNeXt-Large variant) to extract  
multi-scale features. The parameters of the back-  
bone are kept frozen to preserve the open-vocabulary  
knowledge acquired during pre-training.
- **Text Encoder:** We utilize the standard CLIP text  
encoder. The input text prompts utilize the Camo-  
Prompts.
- **Decoder:** The mask decoder is adapted from the Seg-  
ment Anything Model (SAM), utilizing our adaptive  
prompt embeddings as input.

### C.2. Training Configuration

All experiments are conducted using the PyTorch frame-  
work on a single NVIDIA GeForce RTX 4090 GPU  
(24GB memory).

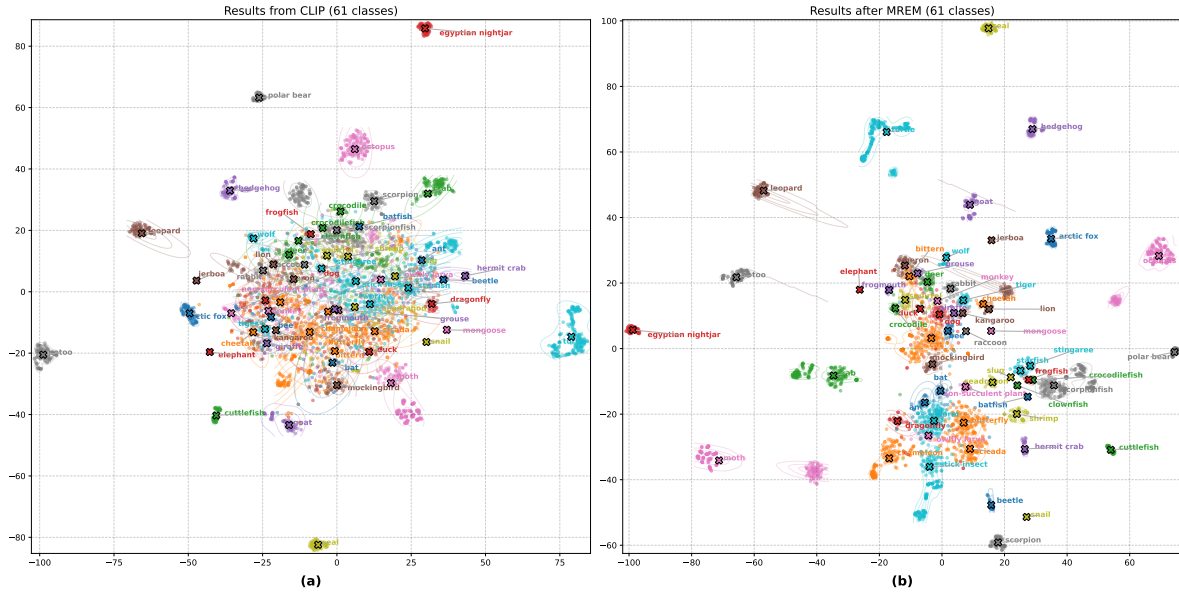

Figure S3. **Visualization of semantic alignment before and after MREM.** The left panel shows the feature distribution (t-SNE) from the original CLIP (61 classes), while the right panel displays the results refined by our MREM. The visualization highlights that MREM effectively enhances the response to the correct semantic categories while suppressing background noise.

- 845 • **Input Resolution:** Images are resized to  $384 \times 384$
- 846 pixels for both training and inference.
- 847 • **Optimizer:** We employ the AdamW optimizer with a
- 848 weight decay of 0.01.
- 849 • **Learning Rate:** The initial learning rate is set to
- 850  $3 \times 10^{-5}$ . We use a cosine annealing scheduler to
- 851 gradually decay the learning rate over 30 epochs.
- 852 • **Batch Size:** Due to memory constraints and the density
- 853 of the feature maps, the batch size is set to 4.

### 854 C.3. Data Augmentation

855 To prevent overfitting on the base categories and im-

856 prove generalization to unseen classes, we apply stan-

857 dard geometric and photometric augmentations:

- 858 • Random horizontal flipping (prob=0.5).
- 859 • Random rotation (degrees=[-10, 10]).
- 860 • Multi-scale jittering (scale range [0.75, 1.25]).
- 861 • Color jittering (brightness, contrast, saturation).

### 862 D. Detailed Experimental Results

863 Tab. S1 provides the detailed quantitative performance

864 for all **61 test categories** in the OVCamo dataset. We re-

865 port four class-aware metrics: Class-aware Average In-

866 tersection over Union ( $cIoU$ ), Class-aware Mean Ab-

867 solute Error ( $cMAE$ ), Class-aware Structure-measure

868 ( $cS_\alpha$ ), and Class-aware Weighted F-measure ( $cF_\beta^w$ ).

#### 869 Observations:

- 870 • **Highest Improvements:** As noted in the quantitative
- 871 analysis, we see massive gains in *Bat* (+12.8%  $cIoU$ ),
- 872 *Clownfish* (+16.1%  $cIoU$ ), and *Wolf* (+7.6%  $cIoU$ ).

This confirms the model’s ability to handle diverse ani-

mal structures.

- 874 • **Failures:** In a few rare cases, such as *Seadragon* (ID
- 875 48), the performance drops slightly compared to the
- 876 baseline. This is likely due to the extremely complex
- 877 texture of the seadragon mimicking the coral ex-
- 878 actly, where the baseline’s aggressive edge detection
- 879 might have fortuitously captured some boundaries that
- 880 our semantic alignment smoothed over. However, the
- 881 overall trend (53/61 wins) remains strongly positive.
- 882

Table S1. Detailed quantitative results per class. **Bold** indicates best performance.

| ID | Class Name         | cIoU $\uparrow$ |              | cMAE $\downarrow$ |              | cS $_{\alpha}$ $\uparrow$ |              | cF $^w_{\beta}$ $\uparrow$ |              |
|----|--------------------|-----------------|--------------|-------------------|--------------|---------------------------|--------------|----------------------------|--------------|
|    |                    | Base            | Ours         | Base              | Ours         | Base                      | Ours         | Base                       | Ours         |
| 0  | owlfly larva       | 0.724           | <b>0.756</b> | 0.060             | <b>0.054</b> | <b>0.865</b>              | 0.852        | 0.780                      | <b>0.846</b> |
| 1  | grouse             | 0.717           | <b>0.724</b> | 0.013             | <b>0.012</b> | <b>0.892</b>              | 0.880        | 0.777                      | <b>0.784</b> |
| 2  | frogmouth          | <b>0.789</b>    | 0.784        | <b>0.028</b>      | 0.028        | <b>0.904</b>              | 0.882        | <b>0.856</b>               | 0.963        |
| 3  | bat                | 0.558           | <b>0.686</b> | 0.054             | <b>0.035</b> | 0.790                     | <b>0.833</b> | 0.658                      | <b>0.784</b> |
| 4  | bee                | 0.328           | <b>0.402</b> | 0.045             | <b>0.036</b> | 0.686                     | <b>0.713</b> | 0.427                      | <b>0.520</b> |
| 5  | blue-tongued skink | 0.495           | <b>0.537</b> | 0.031             | <b>0.029</b> | 0.758                     | <b>0.771</b> | 0.582                      | <b>0.619</b> |
| 6  | caterpillar        | 0.621           | <b>0.652</b> | 0.026             | <b>0.024</b> | 0.862                     | <b>0.888</b> | 0.739                      | <b>0.798</b> |
| 7  | cat                | 0.835           | <b>0.851</b> | 0.005             | <b>0.004</b> | 0.941                     | <b>0.948</b> | 0.923                      | <b>0.942</b> |
| 8  | centipede          | 0.472           | <b>0.489</b> | 0.012             | <b>0.009</b> | 0.821                     | <b>0.845</b> | 0.604                      | <b>0.678</b> |
| 9  | chameleon          | 0.648           | <b>0.670</b> | 0.025             | <b>0.021</b> | 0.816                     | <b>0.845</b> | 0.746                      | <b>0.783</b> |
| 10 | cheetah            | 0.749           | <b>0.808</b> | 0.018             | <b>0.012</b> | 0.879                     | <b>0.900</b> | 0.836                      | <b>0.892</b> |
| 11 | cicada             | 0.646           | <b>0.667</b> | 0.030             | <b>0.028</b> | 0.823                     | <b>0.847</b> | 0.751                      | <b>0.776</b> |
| 12 | crab               | 0.579           | <b>0.635</b> | 0.030             | <b>0.027</b> | 0.791                     | <b>0.806</b> | 0.679                      | <b>0.756</b> |
| 13 | crocodilefish      | 0.458           | <b>0.537</b> | 0.060             | <b>0.057</b> | 0.689                     | <b>0.746</b> | 0.566                      | <b>0.617</b> |
| 14 | deer               | <b>0.818</b>    | 0.776        | <b>0.006</b>      | 0.012        | <b>0.947</b>              | 0.902        | <b>0.925</b>               | 0.869        |
| 15 | dog                | 0.831           | <b>0.882</b> | 0.007             | <b>0.005</b> | 0.932                     | <b>0.941</b> | 0.898                      | <b>0.943</b> |
| 16 | dragonfly          | 0.427           | <b>0.498</b> | 0.021             | <b>0.016</b> | 0.720                     | <b>0.778</b> | 0.526                      | <b>0.641</b> |
| 17 | duck               | 0.514           | <b>0.537</b> | 0.050             | <b>0.048</b> | 0.701                     | <b>0.738</b> | 0.604                      | <b>0.624</b> |
| 18 | egyptian nightjar  | <b>0.537</b>    | 0.527        | <b>0.059</b>      | 0.062        | <b>0.728</b>              | 0.725        | <b>0.620</b>               | 0.610        |
| 19 | elephant           | 0.802           | <b>0.853</b> | 0.013             | <b>0.010</b> | 0.892                     | <b>0.909</b> | 0.864                      | <b>0.908</b> |
| 20 | fish               | 0.626           | <b>0.668</b> | 0.030             | <b>0.024</b> | 0.784                     | <b>0.825</b> | 0.704                      | <b>0.764</b> |
| 21 | flounder           | 0.646           | <b>0.718</b> | 0.035             | <b>0.027</b> | 0.764                     | <b>0.826</b> | 0.713                      | <b>0.799</b> |
| 22 | gecko              | 0.698           | <b>0.730</b> | 0.023             | <b>0.021</b> | 0.850                     | <b>0.877</b> | 0.784                      | <b>0.827</b> |
| 23 | giraffe            | 0.849           | <b>0.883</b> | 0.008             | <b>0.006</b> | 0.921                     | <b>0.933</b> | 0.911                      | <b>0.944</b> |
| 24 | goat               | 0.757           | <b>0.809</b> | 0.015             | <b>0.013</b> | 0.909                     | <b>0.919</b> | 0.861                      | <b>0.902</b> |
| 25 | grasshopper        | 0.626           | <b>0.657</b> | 0.025             | <b>0.021</b> | 0.836                     | <b>0.865</b> | 0.735                      | <b>0.775</b> |
| 26 | hedgehog           | 0.589           | <b>0.678</b> | 0.038             | <b>0.029</b> | 0.784                     | <b>0.832</b> | 0.695                      | <b>0.783</b> |
| 27 | hermit crab        | 0.531           | <b>0.589</b> | 0.047             | <b>0.037</b> | 0.745                     | <b>0.791</b> | 0.637                      | <b>0.706</b> |
| 28 | heron              | 0.635           | <b>0.652</b> | 0.024             | <b>0.022</b> | 0.831                     | <b>0.849</b> | 0.741                      | <b>0.776</b> |
| 29 | human              | 0.713           | <b>0.751</b> | 0.024             | <b>0.021</b> | 0.844                     | <b>0.876</b> | 0.794                      | <b>0.836</b> |
| 30 | kangaroo           | 0.770           | <b>0.784</b> | 0.010             | <b>0.009</b> | 0.908                     | <b>0.914</b> | 0.868                      | <b>0.878</b> |
| 31 | katydid            | 0.533           | <b>0.595</b> | 0.029             | <b>0.024</b> | 0.781                     | <b>0.822</b> | 0.627                      | <b>0.716</b> |
| 32 | leopard            | 0.682           | <b>0.741</b> | 0.038             | <b>0.031</b> | 0.812                     | <b>0.835</b> | 0.785                      | <b>0.830</b> |
| 33 | lion               | 0.832           | <b>0.858</b> | 0.011             | <b>0.009</b> | 0.905                     | <b>0.916</b> | 0.898                      | <b>0.928</b> |
| 34 | lizard             | 0.472           | <b>0.520</b> | 0.040             | <b>0.028</b> | 0.753                     | <b>0.761</b> | 0.546                      | <b>0.601</b> |
| 35 | scorpion           | 0.388           | <b>0.461</b> | 0.033             | <b>0.019</b> | 0.690                     | <b>0.725</b> | 0.438                      | <b>0.564</b> |
| 36 | mantis             | 0.457           | <b>0.503</b> | 0.022             | <b>0.018</b> | 0.769                     | <b>0.798</b> | 0.554                      | <b>0.644</b> |
| 37 | mockingbird        | 0.652           | <b>0.668</b> | 0.023             | <b>0.022</b> | 0.857                     | <b>0.871</b> | 0.748                      | <b>0.768</b> |
| 38 | monkey             | 0.758           | <b>0.774</b> | 0.015             | <b>0.013</b> | 0.881                     | <b>0.902</b> | 0.837                      | <b>0.871</b> |
| 39 | moth               | 0.549           | <b>0.598</b> | 0.032             | <b>0.029</b> | 0.763                     | <b>0.803</b> | 0.634                      | <b>0.715</b> |
| 40 | pipefish           | <b>0.353</b>    | 0.350        | <b>0.035</b>      | 0.037        | 0.641                     | <b>0.643</b> | <b>0.431</b>               | 0.426        |
| 41 | polar bear         | 0.881           | <b>0.911</b> | 0.006             | <b>0.004</b> | 0.948                     | <b>0.963</b> | 0.946                      | <b>0.967</b> |
| 42 | rabbit             | 0.748           | <b>0.808</b> | 0.012             | <b>0.008</b> | 0.902                     | <b>0.934</b> | 0.842                      | <b>0.904</b> |
| 43 | raccoon            | <b>0.773</b>    | 0.745        | <b>0.030</b>      | 0.033        | <b>0.836</b>              | 0.801        | <b>0.860</b>               | 0.836        |
| 44 | rat                | 0.698           | <b>0.771</b> | 0.017             | <b>0.013</b> | 0.867                     | <b>0.906</b> | 0.804                      | <b>0.880</b> |
| 45 | scorpionfish       | 0.559           | <b>0.646</b> | 0.041             | <b>0.030</b> | 0.752                     | <b>0.814</b> | 0.657                      | <b>0.756</b> |
| 46 | clownfish          | 0.386           | <b>0.547</b> | 0.028             | <b>0.014</b> | 0.719                     | <b>0.798</b> | 0.437                      | <b>0.612</b> |
| 47 | frogfish           | <b>0.772</b>    | 0.531        | <b>0.042</b>      | 0.100        | <b>0.906</b>              | 0.716        | <b>0.822</b>               | 0.590        |
| 48 | seadragon          | <b>0.409</b>    | 0.339        | <b>0.114</b>      | 0.116        | <b>0.686</b>              | 0.606        | <b>0.521</b>               | 0.469        |
| 49 | stingaree          | <b>0.728</b>    | 0.589        | <b>0.067</b>      | 0.107        | <b>0.852</b>              | 0.745        | <b>0.793</b>               | 0.660        |
| 50 | crocodile          | 0.671           | <b>0.713</b> | 0.030             | <b>0.024</b> | 0.855                     | <b>0.869</b> | 0.737                      | <b>0.806</b> |
| 51 | sheep              | 0.820           | <b>0.866</b> | 0.008             | <b>0.006</b> | 0.931                     | <b>0.946</b> | 0.889                      | <b>0.928</b> |
| 52 | shrimp             | 0.581           | <b>0.610</b> | 0.026             | <b>0.025</b> | 0.777                     | <b>0.796</b> | 0.674                      | <b>0.716</b> |
| 53 | slug               | 0.605           | <b>0.611</b> | <b>0.028</b>      | 0.033        | <b>0.812</b>              | 0.796        | <b>0.721</b>               | 0.683        |
| 54 | snail              | 0.408           | <b>0.448</b> | 0.039             | <b>0.034</b> | 0.719                     | <b>0.748</b> | 0.466                      | <b>0.534</b> |
| 55 | snake              | 0.615           | <b>0.646</b> | 0.026             | <b>0.025</b> | 0.807                     | <b>0.831</b> | 0.717                      | <b>0.756</b> |
| 56 | spider             | 0.539           | <b>0.586</b> | 0.024             | <b>0.020</b> | 0.785                     | <b>0.820</b> | 0.642                      | <b>0.705</b> |
| 57 | squirrel           | 0.649           | <b>0.692</b> | 0.024             | <b>0.021</b> | 0.822                     | <b>0.845</b> | 0.727                      | <b>0.786</b> |
| 58 | stick insect       | 0.254           | <b>0.327</b> | 0.038             | <b>0.034</b> | 0.606                     | <b>0.650</b> | 0.322                      | <b>0.411</b> |
| 59 | tiger              | 0.782           | <b>0.828</b> | 0.017             | <b>0.012</b> | 0.873                     | <b>0.896</b> | 0.851                      | <b>0.904</b> |
| 60 | wolf               | 0.757           | <b>0.833</b> | 0.012             | <b>0.009</b> | 0.887                     | <b>0.920</b> | 0.827                      | <b>0.898</b> |
